# Supplementary material for: Anti-tumor effect of infant-derived Enterococcus via the inhibition of proliferation and inflammation as well as the promotion of apoptosis
Source: Royal Society of Chemistry journal article supplement (doi:10.1039/d2fo03045d), 2023-01-01
Supplement: d2fo03045d1.pdf [file d2fo03045d1.pdf]

**Table S1** All primers used in this study.

| Name                            | Forward primer (5'-3')        | Reverse primer (5'-3')   |
|---------------------------------|-------------------------------|--------------------------|
| <i>LDHA</i>                     | ATGCCCTACCAATATCCAGCA         | GCTCCCAGTGGACTCATCTG     |
| <i>VEGF</i>                     | GAGTCTGTGCTCTGGGATTT          | TCCGAAGTGATTTGAGGGA      |
| <i>MMP-2</i>                    | CTTCAGGTTCTCCAGCATGA          | CACCTTGGCACACCTGTATC     |
| <i>MMP-9</i>                    | TCCTTGCAATGTGGATGTTT          | CGTCCTTGAAGAAATGCAGA     |
| <i>HIF-1<math>\alpha</math></i> | TCACGAGGGGTTCCTCCGCTCGCA      | TGCGAGGCGGGAAACCCCTCGTGA |
| <i>Bax</i>                      | GAGAGGTCTTCTTCCGGGTG          | TCTTGGATCCAGACAAGCAGC    |
| <i>Bcl-2</i>                    | GAAGTGGGGGAGGATTGTGG          | GCATGCTGGGGCCATATAGT     |
| <i>Caspase-3</i>                | CAGACAGTGGAAGTACGAT           | TTTCAGCATGGCGACAAGTG     |
| <i>p53</i>                      | GTGCTCACCTGGCTAAAGT           | TGGCAGTCATCCAGTCTTCG     |
| <i>IL-6</i>                     | TAGTCCTTCCTACCCCAATTCC        | TTGGTCCTTAGCCACTCCTTC    |
| <i>TGF-<math>\beta</math></i>   | TGCCCTCTACAACCAACACAACCC<br>G | AACTGCTCCACCTTGGGCTTGCGA |
| <i>IL-17a</i>                   | AGATGAGTCCAGGGAGAGCTTCA<br>TC | GATCCTTAGGCTGCCTGGCGGAC  |
| <i><math>\beta</math>-actin</i> | GCCCCTGAGGAGCACCCCTGT         | ACGCTCGGTCAGGATCTTCA     |
